# Supplementary material for: Effects of combined tiotropium/olodaterol on inspiratory capacity and exercise endurance in COPD
Source: PubMed Central journal article supplement — Eur Respir J. 2017 Apr 20;49(4):1601348. doi: 10.1183/13993003.01348-2016 (PMC5898947; doi:10.1183/13993003.01348-2016), 2017-04-20
Supplement: ERJ-01348-2016_supplementary_material.pdf [file ERJ-01348-2016_supplementary_material.pdf]

## **Online supplementary material**

### **Methods**

#### **Patients**

Patients were not permitted to take long-acting  $\beta_2$ -agonists or long-acting muscarinic antagonists (other than study medication) during the baseline, treatment and washout periods. Short-acting muscarinic antagonists were not allowed during the treatment periods but were permitted during baseline and washout periods (with an 8-h washout prior to assessments). Patients continued with inhaled corticosteroids if taken at baseline. Open-label salbutamol (albuterol) was provided as rescue medication throughout the study.

#### **End points**

The slope of breathing discomfort was used as a secondary end point instead of isotime due to the incomplete-crossover design of the study. Inspiratory capacity (IC) and intensity of breathing discomfort at isotime were originally planned to be determined for the primary (in addition to exercise endurance time [EET] during constant work-rate cycle ergometry [CWRCE] to symptom limitation at 75% of peak work rate) and key secondary end points but were subsequently moved to further end points prior to database lock.

#### ***Post hoc* analyses**

We performed the following *post hoc* analyses to identify a subgroup in which treatment responses to tiotropium/olodaterol were superior to tiotropium alone: IC and EET in subgroups defined by Global initiative for chronic Obstructive Lung Disease

stage (1/2 and 3/4); EET in subgroups by quartiles of percent predicted IC and IC (<80% predicted and  $\geq$ 80% predicted); EET by locus of symptom limitation at baseline; IC and EET in subgroups defined by static hyperinflation and either static hyperinflation and/or dynamic hyperinflation. Static hyperinflation was defined as functional residual capacity (FRC) >120% predicted (comparisons of subgroups for FRC <120% predicted and FRC  $\geq$ 120% predicted were performed). Dynamic hyperinflation was defined as end-exercise IC minus pre-exercise IC value of >100 mL. To be included in the analysis, patients were required to have an FRC  $\geq$ 120% predicted or dynamic hyperinflation (or both).

Finally, we also compared demographics and baseline characteristics in patient subgroups defined according to whether EET treatment responses were superior to, or shorter than/equal to, tiotropium/olodaterol *versus* monotherapy. Due to the incomplete crossover design of the trial, these analyses were performed only for those patients who received both tiotropium/olodaterol 5/5  $\mu$ g and tiotropium 5  $\mu$ g.

These analyses did not identify any specific subgroup of patients exhibiting greater improvements in EET with tiotropium/olodaterol *versus* monotherapy.

### **Other assessments**

Spirometry (forced expiratory volume in 1 s [FEV<sub>1</sub>], forced vital capacity [FVC]) was conducted 30 min prior to dosing and 1 h post-dose at the randomisation visit and after 6 weeks of treatment. Safety was assessed via adverse events (AEs) recorded throughout the trial, and vital signs, blood chemistry and electrocardiogram were recorded at the end of each treatment period.

## Statistical analysis

Standard deviation for within-patient treatment difference of  $\log_{10}$  endurance time was  $\sim 0.181$  s for patients with chronic obstructive pulmonary disease (COPD) in a similar crossover trial that assessed the effects of tiotropium 18  $\mu\text{g}$  once daily and salmeterol 50  $\mu\text{g}$  twice daily versus twice-daily fluticasone/salmeterol (500/50  $\mu\text{g}$ ) on static lung volumes and exercise tolerance (EudraCT 2006-004086-33). Using this standard deviation, it was estimated that a sample size of 203 patients would detect a treatment difference of 10% with 90% power at the 5% significance level for the primary end point of EET ( $\log_{10}$  transformed) during CWRCE. This sample size would also detect a treatment difference of 0.1 L with  $\geq 90\%$  power at the 5% significance level for the primary end point of IC based on a standard deviation value of 0.42 from trial NCT01040130 for both studies [1].

## Results

### Spirometry

In both studies,  $\text{FEV}_1$  and FVC (1 h post-dose) significantly increased after 6 weeks with both doses of tiotropium/olodaterol compared to placebo and monocomponents (tables S4 and S5).  $\text{FEV}_1$  increased by 286–329 mL with tiotropium/olodaterol *versus* placebo and 77–135 mL *versus* monotherapies across both studies. FVC treatment differences were slightly larger in MORACTO<sup>®</sup> 2 than in MORACTO<sup>®</sup> 1: increases were  $>300$  mL for both doses of tiotropium/olodaterol *versus* placebo in MORACTO<sup>®</sup> 1 and  $>450$  mL in MORACTO<sup>®</sup> 2. Compared to monotherapies, tiotropium/olodaterol increased FVC by  $>100$  mL in MORACTO<sup>®</sup> 1 and  $>140$  mL in MORACTO<sup>®</sup> 2. Trough  $\text{FEV}_1$  significantly increased by 167–208 mL with

tiotropium/olodaterol *versus* placebo and 28–93 mL *versus* monotherapies in MORACTO<sup>®</sup> 1, although differences for tiotropium/olodaterol *versus* tiotropium 5 µg were only significant at the tiotropium/olodaterol 5/5 µg dose. In MORACTO<sup>®</sup> 2, trough FEV<sub>1</sub> increased with tiotropium/olodaterol by 168–205 mL *versus* placebo and >70 mL *versus* olodaterol 5 µg (tables S4 and S5). Trough FVC significantly increased with tiotropium/olodaterol 2.5/5 and 5/5 µg compared to placebo (>250 mL) and olodaterol 5 µg (>100 mL) in both studies. In both studies, tiotropium/olodaterol 5/5 µg but not 2.5/5 µg significantly improved trough FVC compared to tiotropium 5 µg (tables S4 and S5).

## **AEs**

The majority of AEs were mild to moderate in intensity, with severe AEs reported in 8.2% of patients overall (table S6). The most common AE was COPD worsening, with incidences of 6.3%, 9.3%, 9.2%, 9.4% and 10.3% of patients receiving tiotropium/olodaterol 2.5/5 and 5/5 µg, tiotropium 5 µg, olodaterol 5 µg and placebo, respectively. Severe AEs were recorded in 12 patients receiving tiotropium/olodaterol 2.5/5 µg, eight receiving tiotropium/olodaterol 5/5 µg, 16 receiving tiotropium 5 µg, eight receiving olodaterol 5 µg and seven patients in the placebo group. In MORACTO<sup>®</sup> 1, three serious AEs were considered to be related to the study drug by the investigator: one was reported in the tiotropium/olodaterol 2.5/5 µg group (cardiac pacemaker insertion), one in the tiotropium/olodaterol 5/5 µg group (angina unstable) and one in the placebo group (ventricular extrasystoles). In MORACTO<sup>®</sup> 2, two serious AEs were considered related by the investigator: one receiving tiotropium/olodaterol 5/5 µg (rash) and one with tiotropium 5 µg (atrial fibrillation).

TABLE S1 Baseline demographics and patient characteristics (treated set) for MORACTO<sup>®</sup> 1 and 2

|                                              | <b>MORACTO<sup>®</sup> 1</b> | <b>MORACTO<sup>®</sup> 2</b> |
|----------------------------------------------|------------------------------|------------------------------|
|                                              | <b>(n=295)</b>               | <b>(n=291)</b>               |
| Male, n (%)                                  | 213 (72.2)                   | 204 (70.1)                   |
| Race, n (%)                                  |                              |                              |
| Black/African American                       | 7 (2.4)                      | 5 (1.7)                      |
| Asian                                        | 1 (0.3)                      | 1 (0.3)                      |
| White                                        | 287 (97.3)                   | 285 (97.9)                   |
| Mean (SD) age, years                         | 62.2 (7.5)                   | 61.2 (7.9)                   |
| Mean (SD) body mass index, kg/m <sup>2</sup> | 27.3 (5.3)                   | 26.7 (4.6)                   |
| Smoking status, n (%)                        |                              |                              |
| Ex-smoker                                    | 181 (61.4)                   | 176 (60.5)                   |
| Current smoker                               | 114 (38.6)                   | 115 (39.5)                   |
| Mean (SD) smoking history, pack-years        | 47.3 (22.9)                  | 44.3 (23.3)                  |

|                                                              |               |               |
|--------------------------------------------------------------|---------------|---------------|
| Mean (SD) pre-bronchodilator screening                       |               |               |
| FEV <sub>1</sub> , L                                         | 1.54 (0.49)   | 1.56 (0.50)   |
| % predicted normal FEV <sub>1</sub> <sup>#</sup>             | 52.64 (13.87) | 52.05 (13.42) |
| Mean (SD) post-bronchodilator screening                      |               |               |
| FEV <sub>1</sub> , L                                         | 1.71 (0.48)   | 1.73 (0.51)   |
| % predicted normal FEV <sub>1</sub> <sup>#</sup>             | 58.59 (12.90) | 57.70 (13.17) |
| Mean (SD) FEV <sub>1</sub> change from pre-bronchodilator, L | 0.17 (0.16)   | 0.17 (0.16)   |
| GOLD stage, n (%)                                            |               |               |
| 1 (≥80% of predicted normal FEV <sub>1</sub> )               | 0 (0.0)       | 1 (0.3)       |
| 2 (50–<80% of predicted normal FEV <sub>1</sub> )            | 215 (72.9)    | 201 (69.1)    |
| 3 (30–<50% of predicted normal FEV <sub>1</sub> )            | 78 (26.4)     | 86 (29.6)     |
| 4 (<30% of predicted normal FEV <sub>1</sub> )               | 2 (0.7)       | 3 (1.0)       |
| Mean (SD) IC pre-exercise, L                                 | 2.535 (0.713) | 2.596 (0.737) |
| % predicted IC                                               | 70.0 (29.6)   | 70.4 (30.6)   |
| Mean (SD) endurance time, <sup>¶</sup> s                     | 520.4 (263.3) | 502.8 (275.5) |

|                                                            |             |             |
|------------------------------------------------------------|-------------|-------------|
| Locus of symptom limitation at end-exercise, n (%)         |             |             |
| Breathing/leg discomfort                                   | 129 (43.7)  | 106 (36.4)  |
| Breathing discomfort                                       | 99 (33.6)   | 108 (37.1)  |
| Leg discomfort                                             | 54 (18.3)   | 68 (23.4)   |
| Mean (SD) breathing discomfort at end-exercise, Borg scale | 6.71 (2.56) | 6.62 (2.27) |
| Mean (SD) leg discomfort at end-exercise, Borg units       | 6.61 (2.69) | 6.28 (2.56) |

---

SD: standard deviation; FEV<sub>1</sub>: forced expiratory volume in 1 s; GOLD: Global initiative for chronic Obstructive Lung Disease;

IC: inspiratory capacity. <sup>#</sup>: based on predicted values defined by the European Community for Steel and Coal [2]; <sup>¶</sup>: arithmetic mean (not log transformed).

TABLE S2 Adjusted mean<sup>#</sup> IC pre-exercise: treatment comparisons after 6 weeks of treatment for MORACTO<sup>®</sup> 1 and 2 (full analysis set)

| Treatment comparison           | Adjusted mean (SE) IC, L | 95% CI       | p value              |
|--------------------------------|--------------------------|--------------|----------------------|
| <b>MORACTO<sup>®</sup> 1</b>   |                          |              |                      |
| Common baseline mean           | 2.533 (0.042)            |              |                      |
| Tiotropium/olodaterol 2.5/5 µg |                          |              |                      |
| <i>versus</i> placebo          | 0.218 (0.027)            | 0.164, 0.271 | <0.0001 <sup>¶</sup> |
| <i>versus</i> olodaterol 5 µg  | 0.092 (0.027)            | 0.038, 0.145 | 0.0008               |
| <i>versus</i> tiotropium 5 µg  | 0.087 (0.027)            | 0.034, 0.141 | 0.0015 <sup>¶</sup>  |
| Tiotropium/olodaterol 5/5 µg   |                          |              |                      |
| <i>versus</i> placebo          | 0.244 (0.027)            | 0.191, 0.298 | <0.0001              |
| <i>versus</i> olodaterol 5 µg  | 0.119 (0.027)            | 0.065, 0.172 | <0.0001              |
| <i>versus</i> tiotropium 5 µg  | 0.114 (0.027)            | 0.061, 0.167 | <0.0001              |



---

**MORACTO<sup>®</sup> 2**


---

|                                |               |              |                      |
|--------------------------------|---------------|--------------|----------------------|
| Common baseline mean           | 2.589 (0.044) |              |                      |
| Tiotropium/olodaterol 2.5/5 µg |               |              |                      |
| <i>versus</i> placebo          | 0.274 (0.025) | 0.224, 0.324 | <0.0001 <sup>¶</sup> |
| <i>versus</i> olodaterol 5 µg  | 0.089 (0.025) | 0.039, 0.138 | 0.0004 <sup>¶</sup>  |
| <i>versus</i> tiotropium 5 µg  | 0.097 (0.025) | 0.047, 0.147 | 0.0001 <sup>¶</sup>  |
| Tiotropium/olodaterol 5/5 µg   |               |              |                      |
| <i>versus</i> placebo          | 0.265 (0.025) | 0.215, 0.315 | <0.0001              |
| <i>versus</i> olodaterol 5 µg  | 0.080 (0.025) | 0.031, 0.129 | 0.0015               |
| <i>versus</i> tiotropium 5 µg  | 0.088 (0.025) | 0.039, 0.137 | 0.0005               |

---

IC: inspiratory capacity; SE: standard error; CI: confidence interval. <sup>#</sup>: adjusted mean difference obtained from mixed-effects model repeated measures approach with fixed effects of treatment and period, study baseline as covariate, patient as a random effect and compound symmetry as a covariance structure for within-patient variation; <sup>¶</sup>: nominal p value.

TABLE S3 Adjusted mean<sup>#</sup> Borg-time slope of the intensity of breathing discomfort (modified Borg scale) during exercise and breathing discomfort (Borg scale) at isotime after 6 weeks of treatment (full analysis set)

|              | <b>MORACTO<sup>®</sup> 1</b> |                                                            |                    |                                              | <b>MORACTO<sup>®</sup> 2</b> |                                                            |                    |                                              |
|--------------|------------------------------|------------------------------------------------------------|--------------------|----------------------------------------------|------------------------------|------------------------------------------------------------|--------------------|----------------------------------------------|
|              | <b>Patients, n</b>           | <b>Adjusted mean<br/>(SE) Borg-time<br/>slope, units/s</b> | <b>Patients, n</b> | <b>Adjusted<br/>mean (SE)<br/>Borg scale</b> | <b>Patients, n</b>           | <b>Adjusted mean<br/>(SE) Borg-time<br/>slope, units/s</b> | <b>Patients, n</b> | <b>Adjusted<br/>mean (SE)<br/>Borg scale</b> |
| Placebo      | 209                          | 0.018 (0.001)                                              | 209                | 5.19 (0.14)                                  | 205                          | 0.018 (0.001)                                              | 206                | 5.08 (0.14)                                  |
| O 5 µg       | 208                          | 0.016 (0.001)                                              | 208                | 4.35 (0.14)                                  | 207                          | 0.017 (0.001)                                              | 207                | 4.94 (0.14)                                  |
| T 5 µg       | 209                          | 0.016 (0.001)                                              | 209                | 4.49 (0.14)                                  | 208                          | 0.015 (0.001)                                              | 209                | 4.56 (0.13)                                  |
| T/O 2.5/5 µg | 212                          | 0.015 (0.001)                                              | 212                | 4.33 (0.14)                                  | 212                          | 0.014 (0.001)                                              | 213                | 4.47 (0.13)                                  |
| T/O 5/5 µg   | 212                          | 0.016 (0.001)                                              | 212                | 4.50 (0.14)                                  | 216                          | 0.015 (0.001)                                              | 216                | 4.39 (0.13)                                  |

SE: standard error; O: olodaterol; T: tiotropium. <sup>#</sup>: adjusted mean obtained from mixed-effects model repeated measures approach with fixed effects of treatment and period, study baseline as covariate, patient as a random effect and compound symmetry as a covariance structure for within-patient variation.

TABLE S4 Adjusted mean<sup>#</sup> FEV<sub>1</sub> and FVC 1 h post-dose, trough FEV<sub>1</sub> and FVC<sup>¶</sup> after 6 weeks of treatment for MORACTO<sup>®</sup> 1 and 2  
(full analysis set)

|                              | <b>Patients, n</b> | <b>Adjusted<br/>mean (SE)<br/>FEV<sub>1</sub>, L</b> | <b>Patients, n</b> | <b>Adjusted<br/>mean (SE)<br/>FVC, L</b> | <b>Patients, n</b> | <b>Adjusted mean<br/>(SE) trough<br/>FEV<sub>1</sub>, L</b> | <b>Patients, n</b> | <b>Adjusted mean<br/>(SE) trough<br/>FVC, L</b> |
|------------------------------|--------------------|------------------------------------------------------|--------------------|------------------------------------------|--------------------|-------------------------------------------------------------|--------------------|-------------------------------------------------|
| <b>MORACTO<sup>®</sup> 1</b> |                    |                                                      |                    |                                          |                    |                                                             |                    |                                                 |
| Placebo                      | 216                | 1.497 (0.013)                                        | 220                | 3.009 (0.023)                            | 216                | 1.461 (0.012)                                               | 216                | 2.926 (0.020)                                   |
| O 5 µg                       | 214                | 1.689 (0.013)                                        | 216                | 3.240 (0.023)                            | 213                | 1.575 (0.012)                                               | 213                | 3.063 (0.020)                                   |
| T 5 µg                       | 218                | 1.706 (0.013)                                        | 223                | 3.275 (0.023)                            | 217                | 1.600 (0.012)                                               | 217                | 3.144 (0.020)                                   |
| T/O 2.5/5 µg                 | 216                | 1.783 (0.013)                                        | 221                | 3.390 (0.023)                            | 216                | 1.628 (0.012)                                               | 216                | 3.180 (0.020)                                   |
| T/O 5/5 µg                   | 224                | 1.820 (0.013)                                        | 225                | 3.420 (0.023)                            | 224                | 1.669 (0.012)                                               | 224                | 3.233 (0.020)                                   |
| <b>MORACTO<sup>®</sup> 2</b> |                    |                                                      |                    |                                          |                    |                                                             |                    |                                                 |
| Placebo                      | 210                | 1.548 (0.016)                                        | 210                | 3.115 (0.026)                            | 210                | 1.516 (0.014)                                               | 210                | 3.079 (0.024)                                   |
| O 5 µg                       | 215                | 1.742 (0.016)                                        | 215                | 3.397 (0.026)                            | 214                | 1.611 (0.014)                                               | 214                | 3.243 (0.024)                                   |

|              |     |               |     |               |     |               |     |               |
|--------------|-----|---------------|-----|---------------|-----|---------------|-----|---------------|
| T 5 µg       | 211 | 1.741 (0.016) | 211 | 3.427 (0.026) | 211 | 1.640 (0.014) | 211 | 3.296 (0.024) |
| T/O 2.5/5 µg | 215 | 1.852 (0.016) | 215 | 3.567 (0.026) | 215 | 1.684 (0.014) | 215 | 3.349 (0.024) |
| T/O 5/5 µg   | 219 | 1.876 (0.016) | 219 | 3.589 (0.025) | 218 | 1.721 (0.014) | 218 | 3.386 (0.023) |

FEV<sub>1</sub>: forced expiratory volume in 1 s; FVC: forced vital capacity; SE: standard error; O: olodaterol; T: tiotropium. #: adjusted mean

difference obtained from mixed-effects model repeated measures approach with fixed effects of treatment and period, period baseline and

patient baseline as covariates, patient as a random effect, compound symmetry as a covariance structure for within-patient variation and

Kenward–Roger approximation of denominator degrees of freedom; †: 30 min pre-dose.

TABLE S5 Adjusted mean FEV<sub>1</sub> and FVC 1 h post-dose, trough FEV<sub>1</sub> and FVC<sup>#</sup> after 6 weeks of treatment for MORACTO<sup>®</sup> 1 and 2: treatment differences (full analysis set)

| Treatment comparison         | Adjusted              | 95% CI   | Adjusted    | 95% CI   | Adjusted                        | 95% CI   | Adjusted          | 95% CI   |
|------------------------------|-----------------------|----------|-------------|----------|---------------------------------|----------|-------------------|----------|
|                              | mean (SE)             |          | mean (SE)   |          | mean (SE)                       |          | mean (SE)         |          |
|                              | FEV <sub>1</sub> , mL |          | FVC, mL     |          | trough<br>FEV <sub>1</sub> , mL |          | trough<br>FVC, mL |          |
| <b>MORACTO<sup>®</sup> 1</b> |                       |          |             |          |                                 |          |                   |          |
| Common baseline mean         | 1497 (29)             |          | 2985 (46)   |          |                                 |          |                   |          |
| T/O 2.5/5 µg                 |                       |          |             |          |                                 |          |                   |          |
| <i>versus</i> placebo        | 286 (15)***           | 256, 315 | 381 (26)*** | 331, 431 | 167 (15)***                     | 139, 196 | 254 (25)***       | 205, 304 |
| <i>versus</i> O 5 µg         | 93 (15)***            | 63, 123  | 149 (26)*** | 99, 200  | 52 (15)**                       | 24, 81   | 117 (25)***       | 67, 167  |
| <i>versus</i> T 5 µg         | 77 (15)***            | 47, 106  | 115 (26)*** | 65, 165  | 28 (15)                         | -1, 56   | 36 (25)           | -13, 86  |
| T/O 5/5 µg                   |                       |          |             |          |                                 |          |                   |          |
| <i>versus</i> placebo        | 323 (15)***           | 293, 352 | 411 (25)*** | 361, 461 | 208 (14)***                     | 180, 236 | 307 (25)***       | 258, 356 |
| <i>versus</i> O 5 µg         | 130 (15)***           | 101, 160 | 179 (26)*** | 129, 230 | 93 (14)***                      | 65, 122  | 170 (25)***       | 120, 219 |

|                       |             |          |             |          |             |          |             |          |
|-----------------------|-------------|----------|-------------|----------|-------------|----------|-------------|----------|
| <i>versus</i> T 5 µg  | 114 (15)*** | 84, 143  | 145 (25)*** | 95, 195  | 68 (14)***  | 40, 97   | 89 (25)**   | 40, 138  |
| <b>MORACTO® 2</b>     |             |          |             |          |             |          |             |          |
| Common baseline mean  | 1528 (31)   |          | 3130 (51)   |          |             |          |             |          |
| T/O 2.5/5 µg          |             |          |             |          |             |          |             |          |
| <i>versus</i> placebo | 305 (18)*** | 269, 340 | 452 (30)*** | 394, 510 | 168 (18)*** | 133, 202 | 271 (29)*** | 214, 327 |
| <i>versus</i> O 5 µg  | 110 (18)*** | 75, 145  | 170 (30)*** | 112, 227 | 73 (18)***  | 38, 107  | 107 (29)**  | 50, 163  |
| <i>versus</i> T 5 µg  | 111 (18)*** | 76, 146  | 140 (30)*** | 82, 198  | 44 (18)*    | 10, 79   | 53 (29)     | -3, 110  |
| T/O 5/5 µg            |             |          |             |          |             |          |             |          |
| <i>versus</i> placebo | 329 (18)*** | 294, 364 | 475 (29)*** | 417, 532 | 205 (18)*** | 170, 239 | 307 (29)*** | 251, 364 |
| <i>versus</i> O 5 µg  | 134 (18)*** | 99, 169  | 192 (29)*** | 135, 250 | 110 (17)*** | 75, 144  | 143 (29)*** | 87, 199  |
| <i>versus</i> T 5 µg  | 135 (18)*** | 100, 170 | 163 (29)*** | 105, 221 | 81 (18)***  | 47, 115  | 90 (29)**   | 34, 146  |

FEV<sub>1</sub>: forced expiratory volume in 1 s; FVC: forced vital capacity; SE: standard error; CI: confidence interval; T: tiotropium;

O: olodaterol. #: 30 min pre-dose. \*\*\*p<0.0001; \*\*p<0.001; \*p<0.05.

TABLE S6 Combined data: summary of AEs (treated set)

|                                | <b>Placebo,<br/>n (%)<br/>(n=436)</b> | <b>Olodaterol 5 µg,<br/>n (%)<br/>(n=435)</b> | <b>Tiotropium 5 µg,<br/>n (%)<br/>(n=444)</b> | <b>Tiotropium/<br/>olodaterol 2.5/5 µg,<br/>n (%) (n=441)</b> | <b>Tiotropium/<br/>olodaterol 5/5 µg,<br/>n (%) (n=450)</b> |
|--------------------------------|---------------------------------------|-----------------------------------------------|-----------------------------------------------|---------------------------------------------------------------|-------------------------------------------------------------|
| Any AE                         | 178 (40.8)                            | 175 (40.2)                                    | 170 (38.3)                                    | 160 (36.3)                                                    | 180 (40.0)                                                  |
| Severe AEs                     | 7 (1.6)                               | 8 (1.8)                                       | 16 (3.6)                                      | 8 (1.8)                                                       | 12 (2.7)                                                    |
| Drug related <sup>#</sup>      | 21 (4.8)                              | 8 (1.8)                                       | 14 (3.2)                                      | 13 (2.9)                                                      | 17 (3.8)                                                    |
| AEs leading to discontinuation | 10 (2.3)                              | 6 (1.4)                                       | 6 (1.4)                                       | 4 (0.9)                                                       | 7 (1.6)                                                     |
| AEs with an incidence >3%      |                                       |                                               |                                               |                                                               |                                                             |
| COPD                           | 45 (10.3)                             | 41 (9.4)                                      | 41 (9.2)                                      | 28 (6.3)                                                      | 42 (9.3)                                                    |
| Nasopharyngitis                | 20 (4.6)                              | 23 (5.3)                                      | 16 (3.6)                                      | 24 (5.4)                                                      | 24 (5.3)                                                    |
| Dyspnoea                       | 19 (4.4)                              | 12 (2.8)                                      | 14 (3.2)                                      | 14 (3.2)                                                      | 11 (2.4)                                                    |
| Cough                          | 17 (3.9)                              | 11 (2.5)                                      | 16 (3.6)                                      | 7 (1.6)                                                       | 7 (1.6)                                                     |
| Headache                       | 6 (1.4)                               | 7 (1.6)                                       | 5 (1.1)                                       | 9 (2.0)                                                       | 10 (2.2)                                                    |

|           |         |          |         |         |         |
|-----------|---------|----------|---------|---------|---------|
| Back pain | 6 (1.4) | 10 (2.3) | 4 (0.9) | 9 (2.0) | 5 (1.1) |
| Influenza | 4 (0.9) | 4 (0.9)  | 6 (1.4) | 5 (1.1) | 5 (1.1) |

---

AE: adverse event; COPD: chronic obstructive pulmonary disease. #: investigator determined.



TABLE S7 Adjusted arithmetic mean exercise endurance time during constant work-rate cycle ergometry after 6 weeks of treatment for MORACTO<sup>®</sup> 1 and 2 (full analysis set)

| <b>Treatment</b>               | <b>MORACTO<sup>®</sup> 1</b> | <b>MORACTO<sup>®</sup> 2</b> | <b>Combined studies</b> |
|--------------------------------|------------------------------|------------------------------|-------------------------|
|                                | <b>Mean (SE)</b>             | <b>Mean (SE)</b>             | <b>Mean (SE)</b>        |
| Placebo                        | 448.4 (17.6)                 | 493.2 (17.8)                 | 470.6 (12.6)            |
| Olodaterol 5 µg                | 531.6 (17.6)                 | 510.2 (17.7)                 | 521.1 (12.6)            |
| Tiotropium 5 µg                | 532.7 (17.6)                 | 539.9 (17.7)                 | 536.2 (12.6)            |
| Tiotropium/olodaterol 2.5/5 µg | 557.0 (17.5)                 | 546.8 (17.6)                 | 552.1 (12.5)            |
| Tiotropium/olodaterol 5/5 µg   | 540.0 (17.5)                 | 567.9 (17.5)                 | 554.5 (12.5)            |

SE: standard error.

## References

1. Maltais F, Kirsten A-M, Hamilton A, De Sousa D, Voß F, Decramer M. Evaluation of the effects of olodaterol on exercise endurance in patients with chronic obstructive pulmonary disease: results from two 6-week crossover studies. *Respir Res* 2016; 17: 77.
2. Quanjer PhH, Tammeling GJ, Cotes JE, Pedersen OF, Peslin R, Yernault J-C. Lung volumes and forced ventilatory flows. *Eur Respir J* 1993; 6 (Suppl 16): 5–40.

FIGURE S1 Hierarchical testing sequence for the primary end points for MORACTO<sup>®</sup> 1 and 2. IC: inspiratory capacity; EET: exercise endurance time; CWRCE: constant work-rate cycle ergometry.

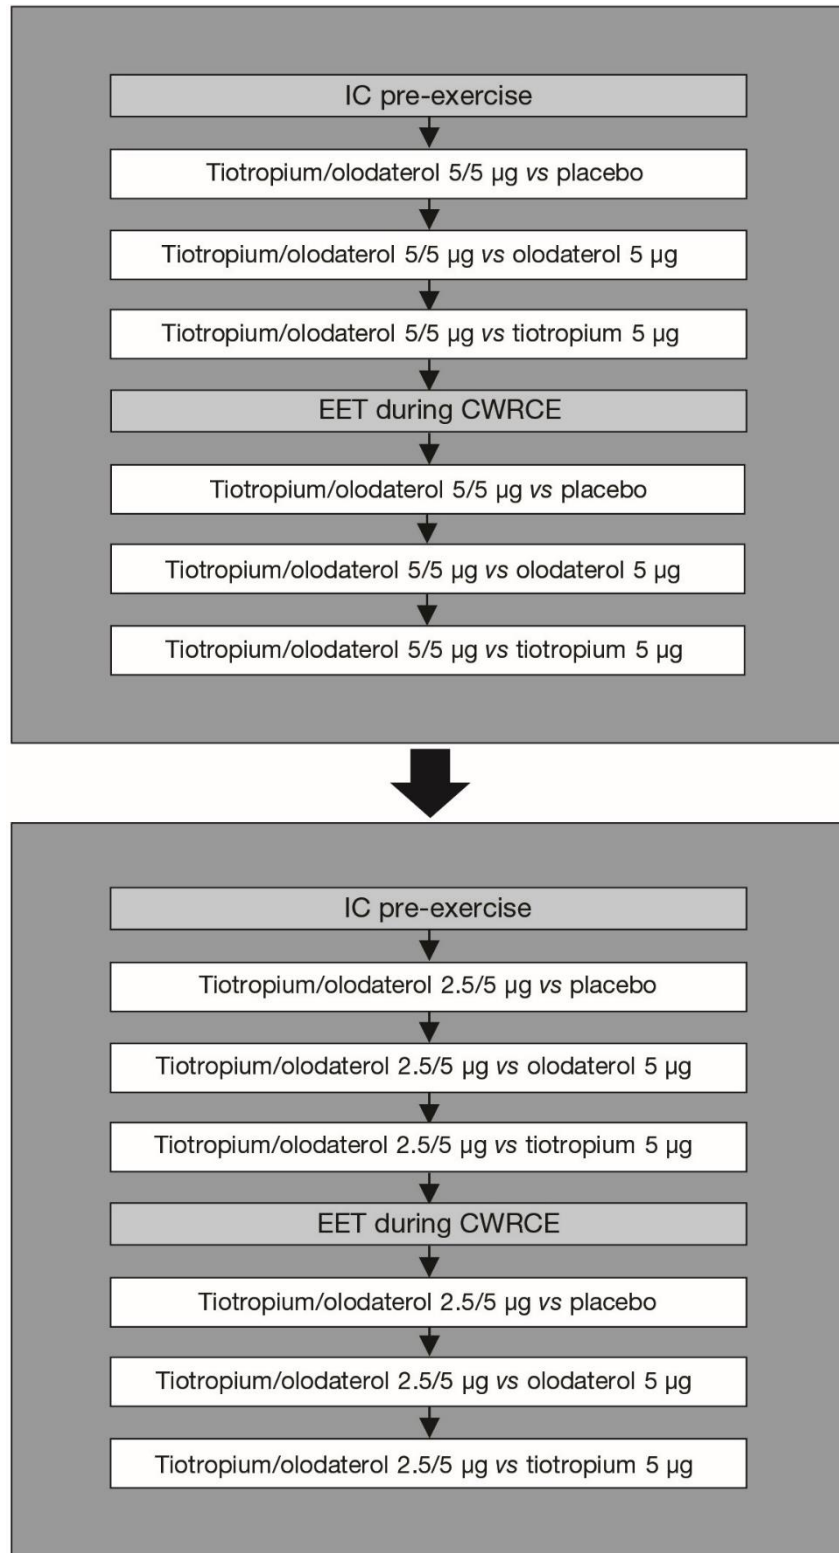

FIGURE S2 Participant flow for (a) combined studies, (b) MORACTO<sup>®</sup> 1 and (c) MORACTO<sup>®</sup> 2. O: olodaterol; T: tiotropium; AE: adverse event; IC: inspiratory capacity; EET: exercise endurance time.

a)

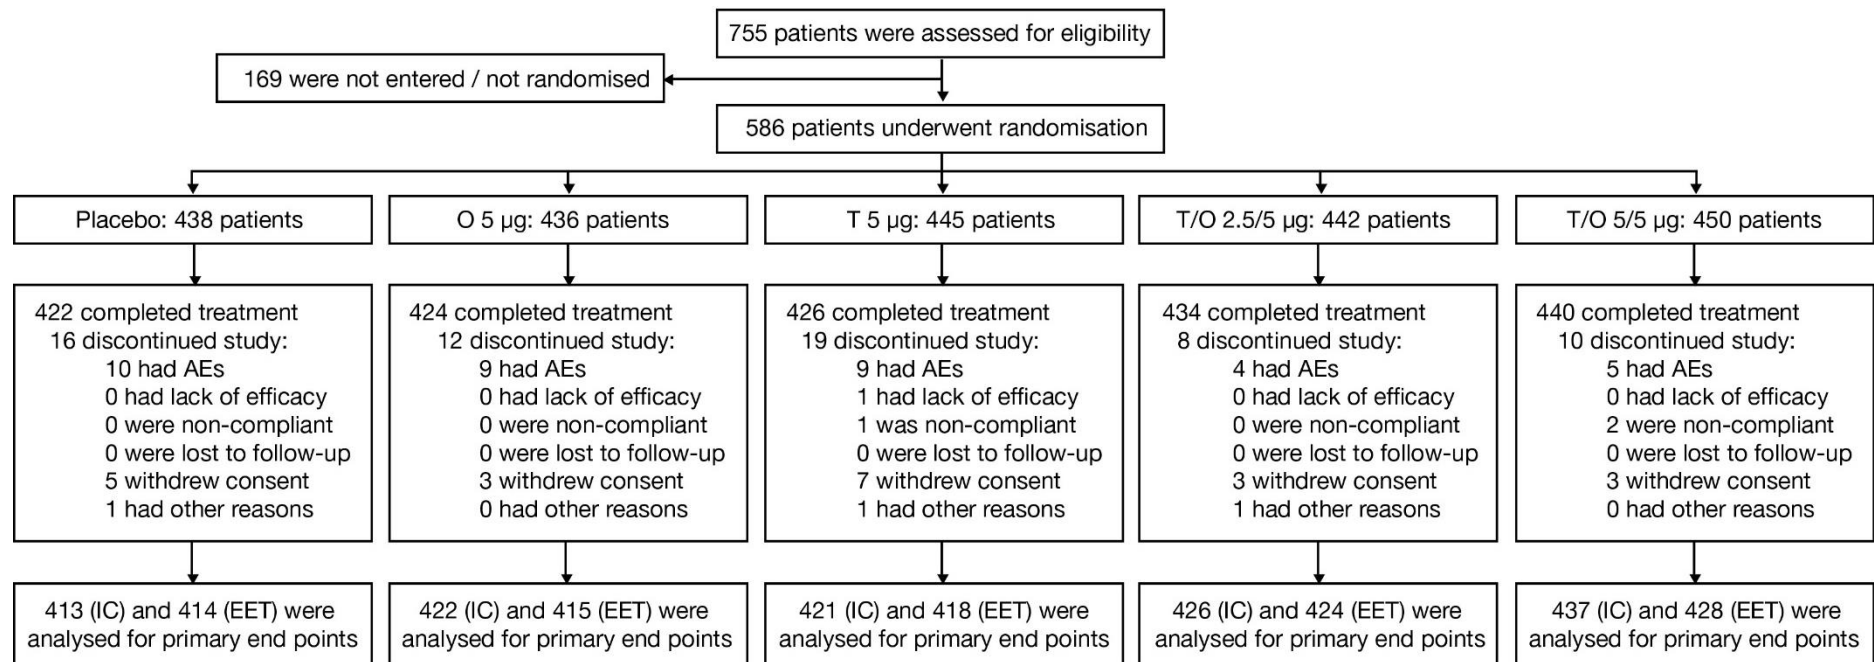

b)

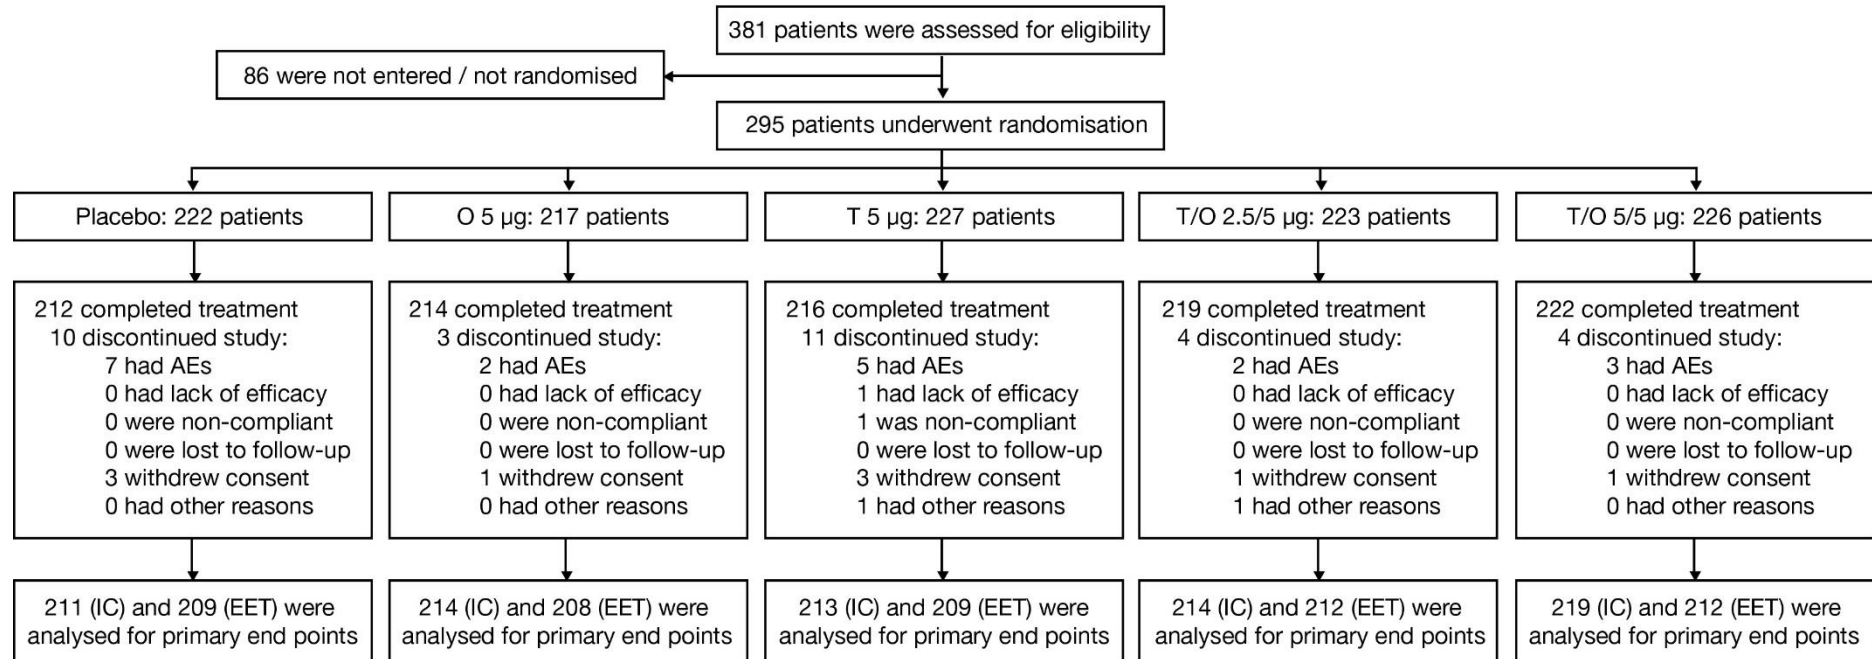

c)

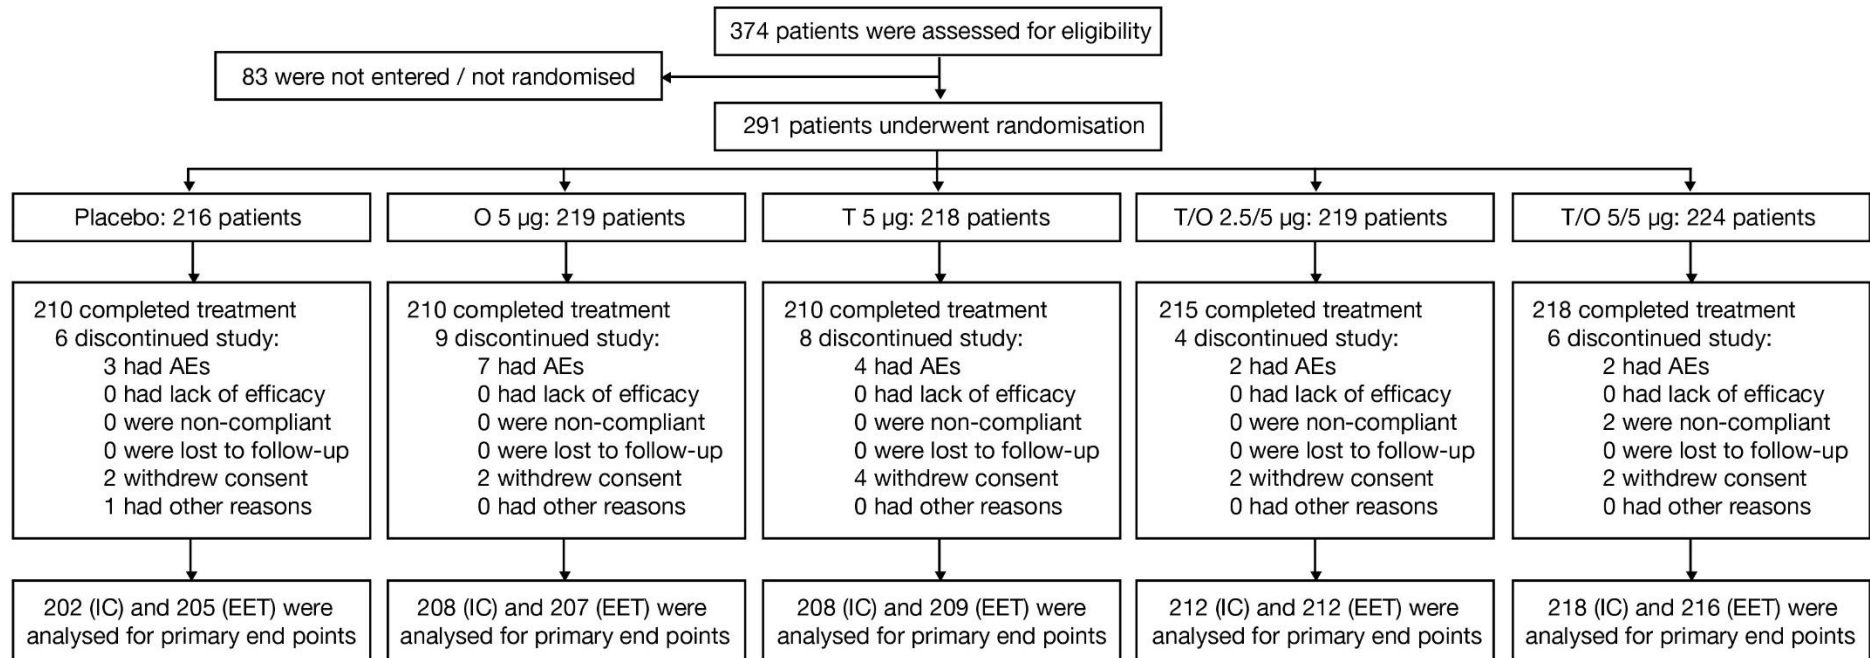

FIGURE S3 Adjusted mean IC pre-exercise, isotime and end-exercise after 6 weeks of treatment for (a) MORACTO<sup>®</sup> 1 and (b) MORACTO<sup>®</sup> 2. O: olodaterol; T: tiotropium; SE: standard error; IC: inspiratory capacity.

a)

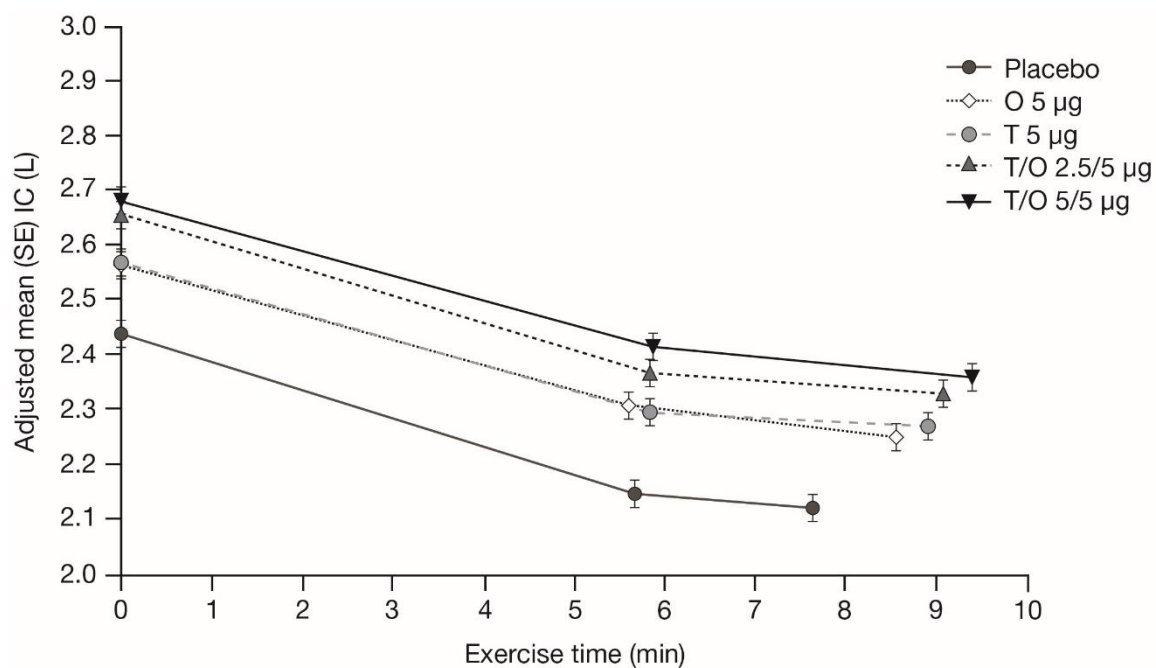

|              | Pre-exercise                                        | Isotime                                             | End-exercise                                         |
|--------------|-----------------------------------------------------|-----------------------------------------------------|------------------------------------------------------|
| T/O 5/5 µg   | p<0.0001 vs placebo;<br>vs T 5 µg; vs O 5 µg        | p<0.0001 vs placebo;<br>vs T 5 µg; vs O 5 µg        | p<0.0001 vs placebo;<br>p<0.001 vs T 5 µg; vs O 5 µg |
| T/O 2.5/5 µg | p<0.0001 vs placebo;<br>p<0.05 vs T 5 µg; vs O 5 µg | p<0.0001 vs placebo;<br>p<0.05 vs T 5 µg; vs O 5 µg | p<0.0001 vs placebo;<br>p<0.05 vs T 5 µg; vs O 5 µg  |

b)

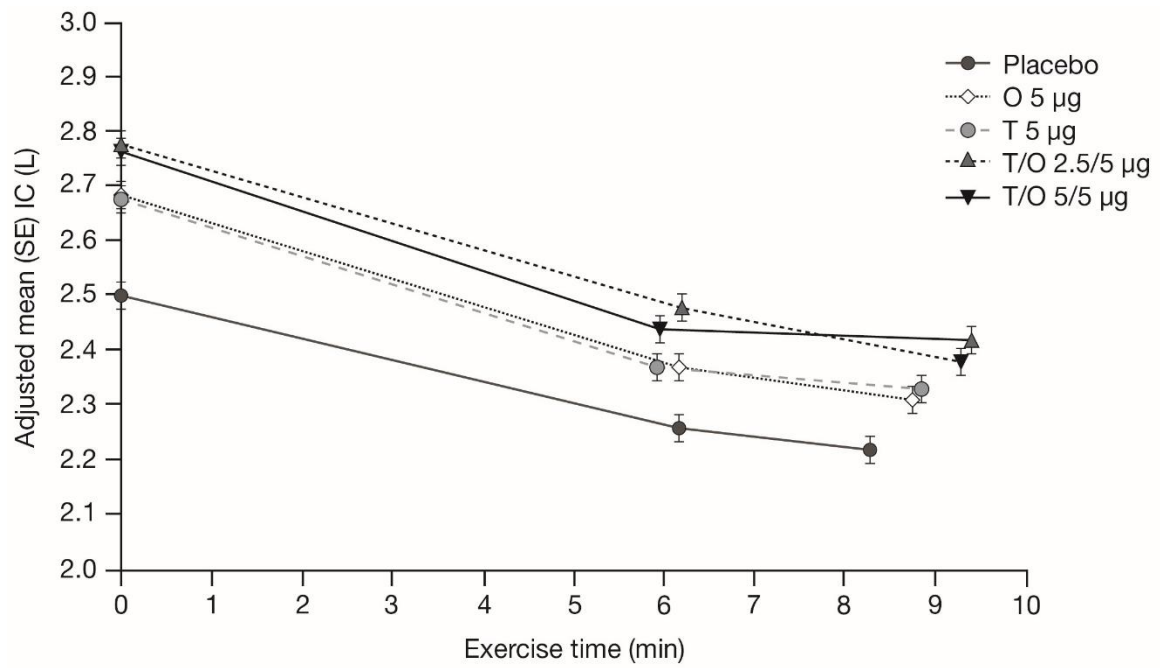

|              | Pre-exercise                                         | Isotime                                              | End-exercise                                         |
|--------------|------------------------------------------------------|------------------------------------------------------|------------------------------------------------------|
| T/O 5/5 µg   | p<0.0001 vs placebo;<br>p<0.05 vs T 5 µg; vs O 5 µg  | p<0.0001 vs placebo;<br>p<0.05 vs T 5 µg; vs O 5 µg  | p<0.0001 vs placebo;<br>p<0.01 vs O 5 µg             |
| T/O 2.5/5 µg | p<0.0001 vs placebo;<br>p<0.001 vs T 5 µg; vs O 5 µg | p<0.0001 vs placebo;<br>p<0.001 vs T 5 µg; vs O 5 µg | p<0.0001 vs placebo;<br>p<0.001 vs T 5 µg; vs O 5 µg |



FIGURE S4 Cumulative proportion of responders for improvements in pre-exercise

IC after 6 weeks of treatment (combined data). O: olodaterol; T: tiotropium;

IC: inspiratory capacity.

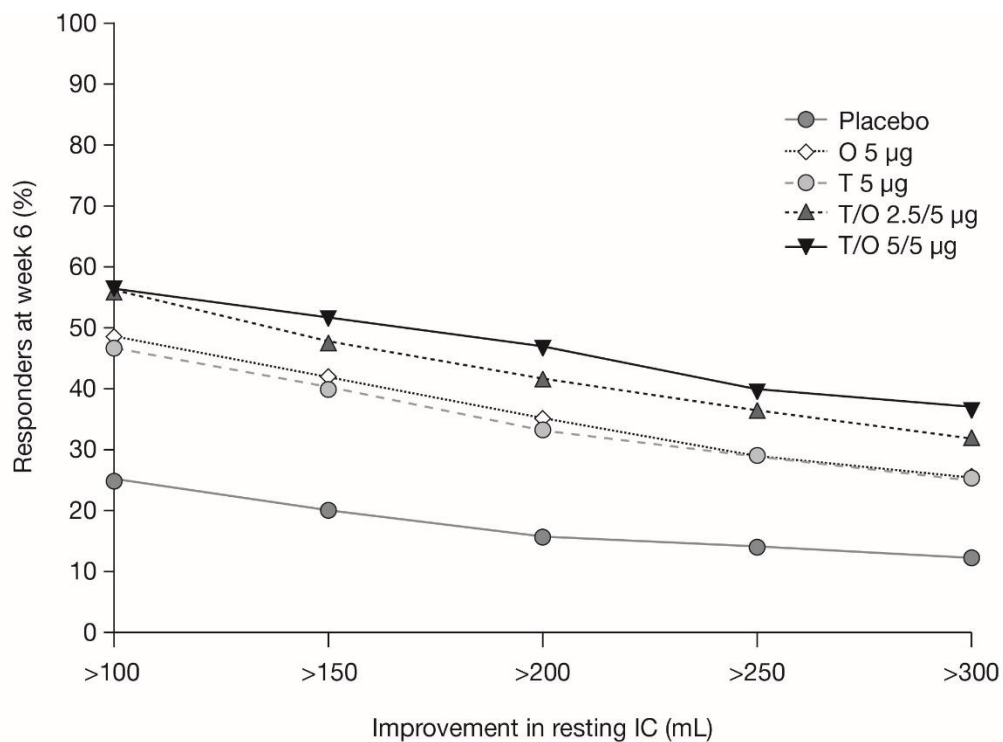

|              | >100 mL IC improvement                                         | >150 mL IC improvement                                        | >200 mL IC improvement                                        | >250 mL IC improvement                                 | >300 mL IC improvement                                        |
|--------------|----------------------------------------------------------------|---------------------------------------------------------------|---------------------------------------------------------------|--------------------------------------------------------|---------------------------------------------------------------|
| T/O 5/5 µg   | p<0.0001 vs placebo;<br>p<0.01 vs O 5 µg;<br>p<0.001 vs T 5 µg | p<0.0001 vs placebo,<br>vs T 5 µg;<br>p<0.001 vs O 5 µg       | p<0.0001 vs placebo;<br>vs O 5 µg;<br>vs T 5 µg               | p<0.0001 vs placebo;<br>vs O 5 µg;<br>vs T 5 µg        | p<0.0001 vs placebo;<br>vs O 5 µg;<br>vs T 5 µg               |
| T/O 2.5/5 µg | p<0.0001 vs placebo;<br>p<0.01 vs O 5 µg;<br>p<0.001 vs T 5 µg | p<0.0001 vs placebo;<br>p<0.05 vs O 5 µg;<br>p<0.01 vs T 5 µg | p<0.0001 vs placebo;<br>p<0.05 vs O 5 µg;<br>p<0.01 vs T 5 µg | p<0.0001 vs placebo;<br>p<0.01 vs O 5 µg;<br>vs T 5 µg | p<0.0001 vs placebo;<br>p<0.05 vs O 5 µg;<br>p<0.01 vs T 5 µg |

FIGURE S5 Adjusted geometric mean EET during constant work-rate cycle ergometry after 6 weeks of treatment for (a) MORACTO<sup>®</sup> 1 and (b) MORACTO<sup>®</sup> 2.

Data were  $\log_{10}$  transformed followed by reverse transformation. \* $p < 0.01$ ;

\*\* $p < 0.001$ ; \*\*\* $p < 0.0001$ . O: olodaterol; T: tiotropium; SE: standard error;

EET: exercise endurance time.

a)

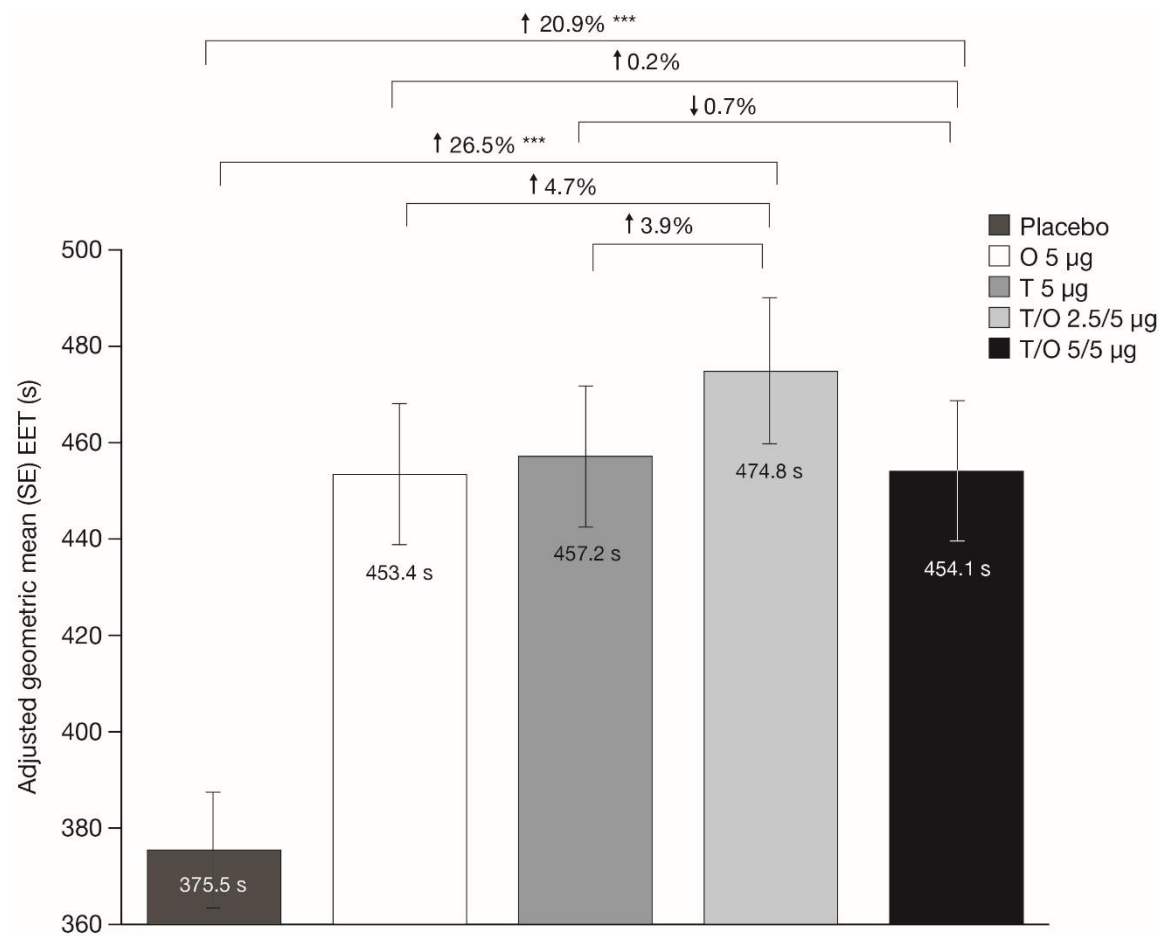

b)

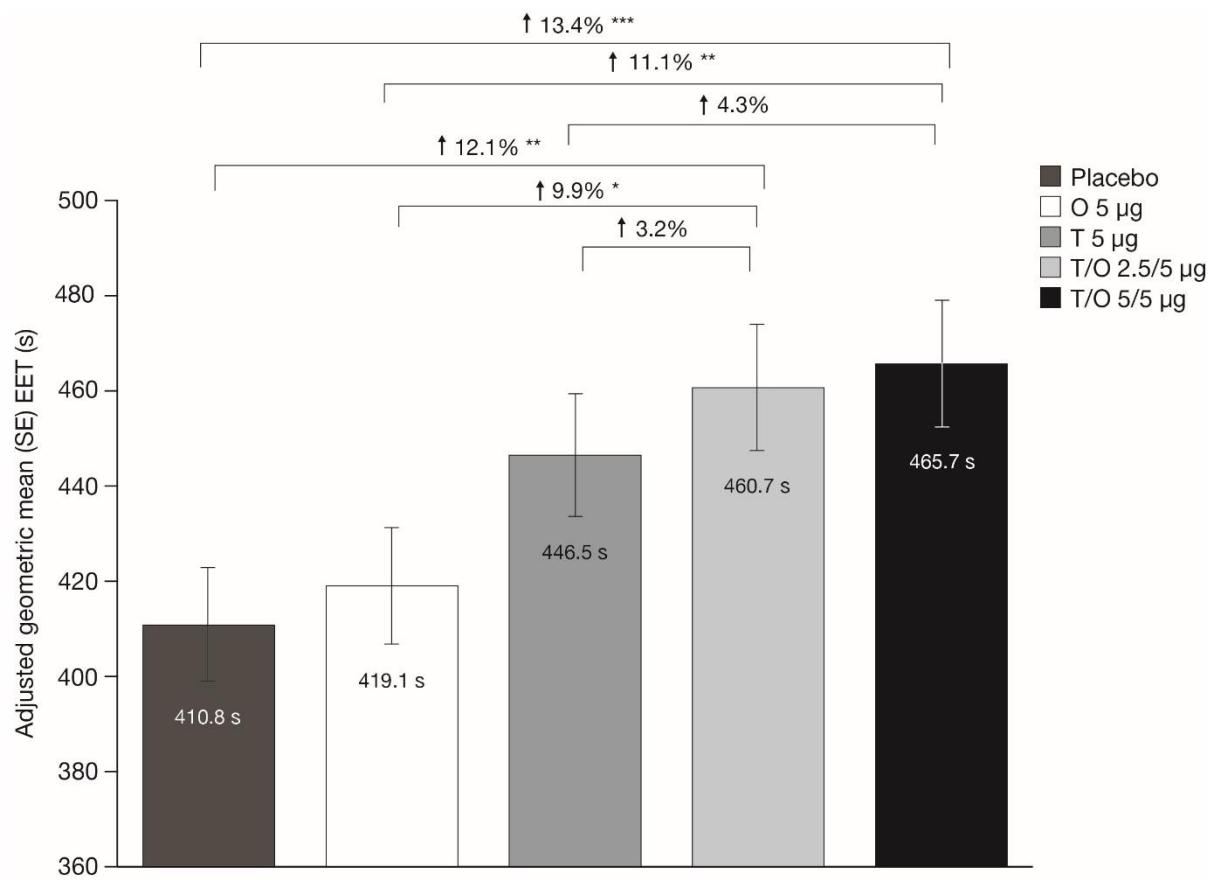

FIGURE S6 Cumulative proportion of responders for improvements in EET during constant work-rate cycle ergometry (percent change from baseline) after 6 weeks of treatment (combined data). O: olodaterol; T: tiotropium; EET: exercise endurance time.

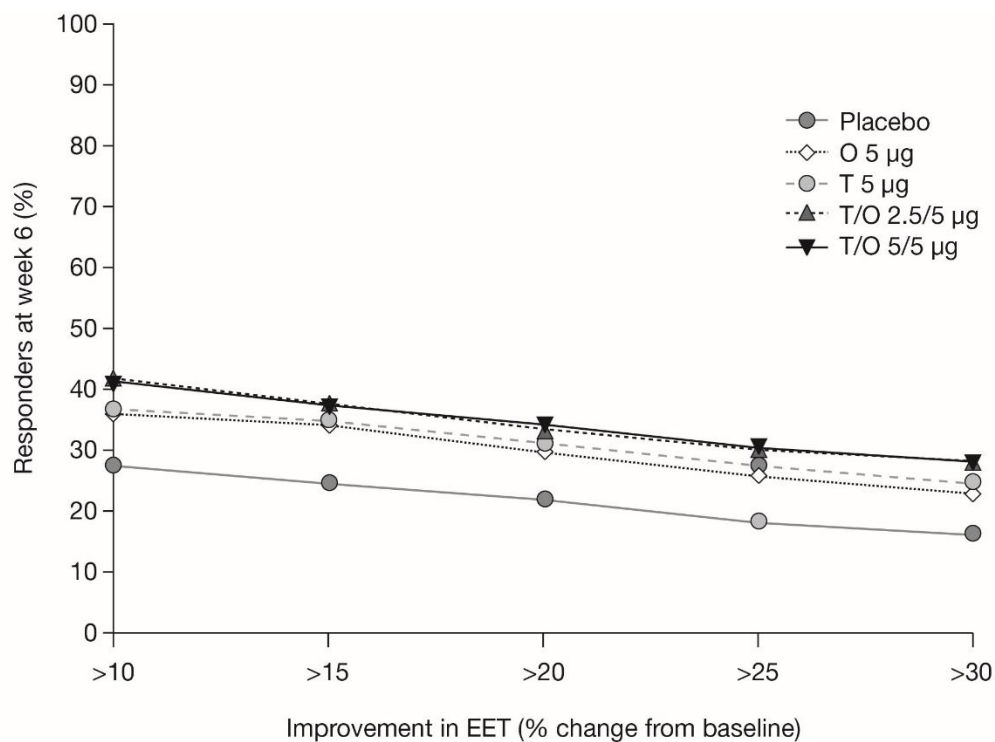

|              | >10% EET improvement                  | >15% EET improvement | >20% EET improvement | >25% EET improvement | >30% EET improvement                  |
|--------------|---------------------------------------|----------------------|----------------------|----------------------|---------------------------------------|
| T/O 5/5 µg   | p<0.0001 vs placebo                   | p<0.0001 vs placebo  | p<0.0001 vs placebo  | p<0.0001 vs placebo  | p<0.0001 vs placebo; p<0.05 vs O 5 µg |
| T/O 2.5/5 µg | p<0.0001 vs placebo; p<0.05 vs O 5 µg | p<0.0001 vs placebo  | p<0.0001 vs placebo  | p<0.0001 vs placebo  | p<0.0001 vs placebo; p<0.05 vs O 5 µg |

FIGURE S7 Cumulative proportion of responders for improvements in EET during constant work-rate cycle ergometry after 6 weeks of treatment (combined data).

O: olodaterol; T: tiotropium; EET: exercise endurance time.

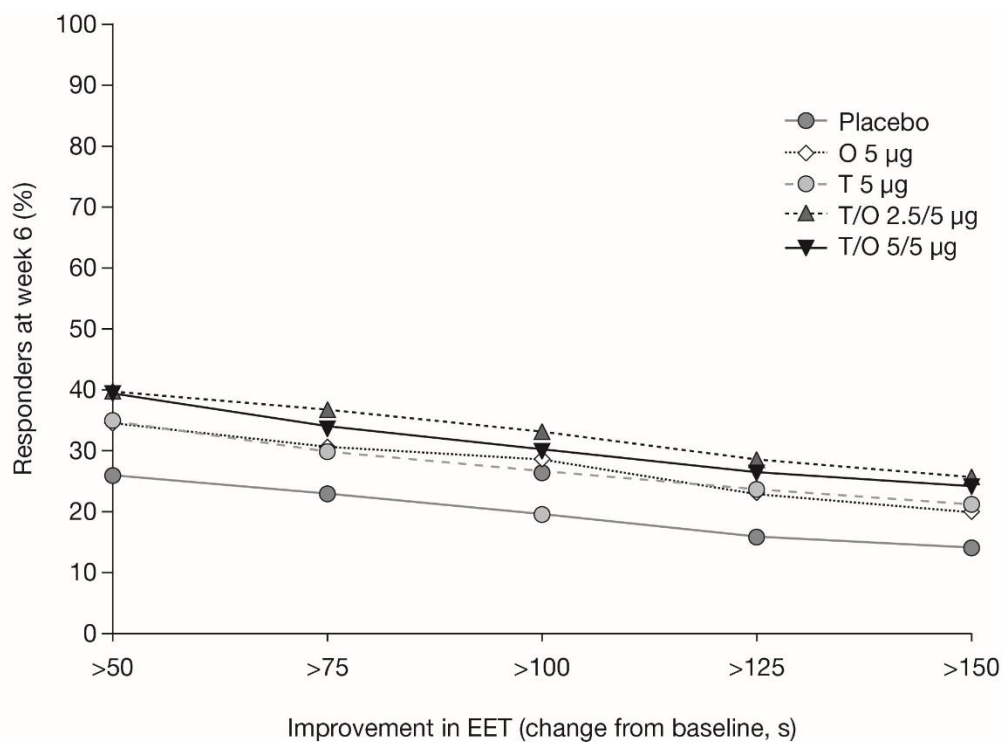

|              | >50 s EET improvement | >75 s EET improvement                                  | >100 s EET improvement                   | >125 s EET improvement                   | >150 s EET improvement                   |
|--------------|-----------------------|--------------------------------------------------------|------------------------------------------|------------------------------------------|------------------------------------------|
| T/O 5/5 µg   | p<0.0001 vs placebo   | p<0.0001 vs placebo                                    | p<0.0001 vs placebo                      | p<0.0001 vs placebo                      | p<0.0001 vs placebo                      |
| T/O 2.5/5 µg | p<0.0001 vs placebo   | p<0.0001 vs placebo;<br>p<0.05 vs O 5 µg,<br>vs T 5 µg | p<0.0001 vs placebo;<br>p<0.05 vs T 5 µg | p<0.0001 vs placebo;<br>p<0.05 vs O 5 µg | p<0.0001 vs placebo;<br>p<0.05 vs O 5 µg |

FIGURE S8 Adjusted mean intensity of breathing discomfort (Borg scale) after 6 weeks at pre-exercise, isotime and end-exercise for (a) MORACTO<sup>®</sup> 1 and (b) MORACTO<sup>®</sup> 2. O: olodaterol; T: tiotropium; SE: standard error; NS: not significant.

a)

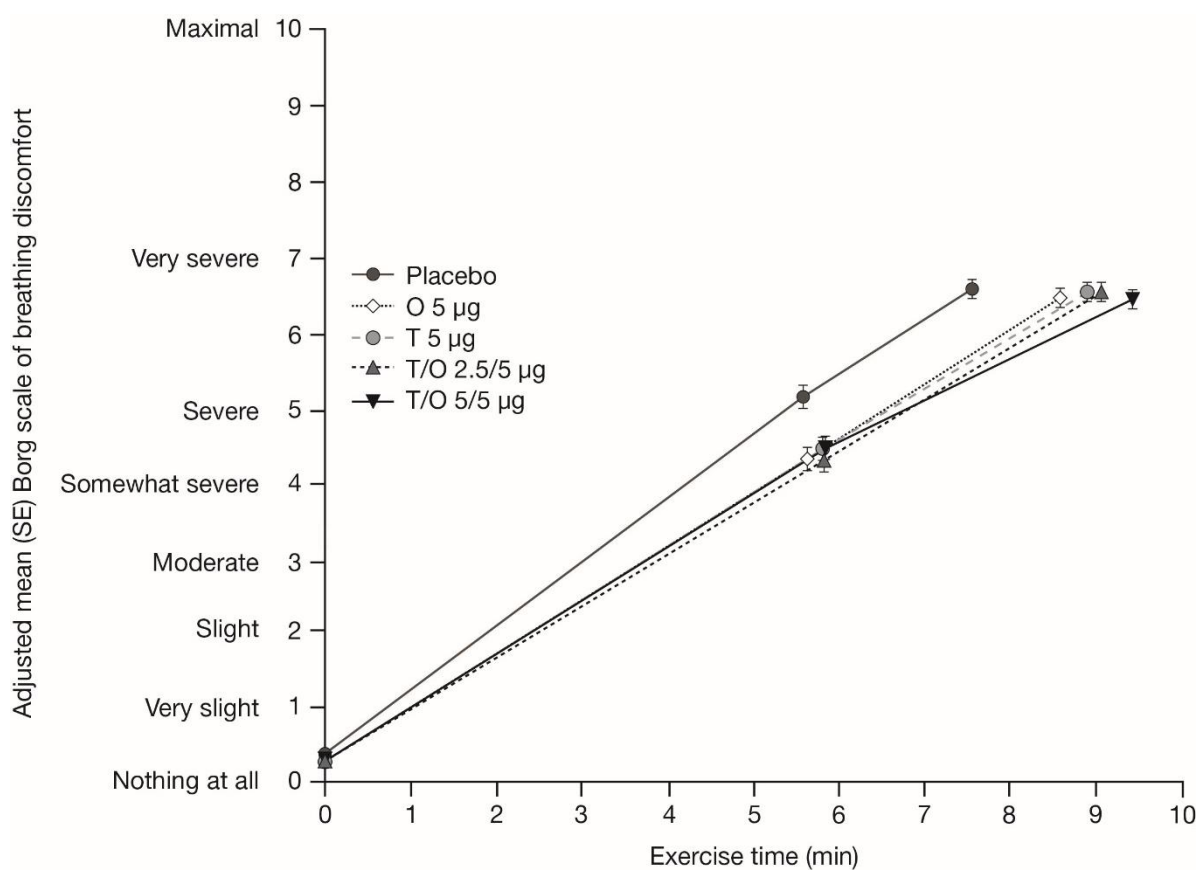

|              | Pre-exercise           | Isotime             | End-exercise           |
|--------------|------------------------|---------------------|------------------------|
| T/O 5/5 µg   | NS for all comparisons | p<0.0001 vs placebo | NS for all comparisons |
| T/O 2.5/5 µg | p<0.05 vs placebo      |                     |                        |

b)

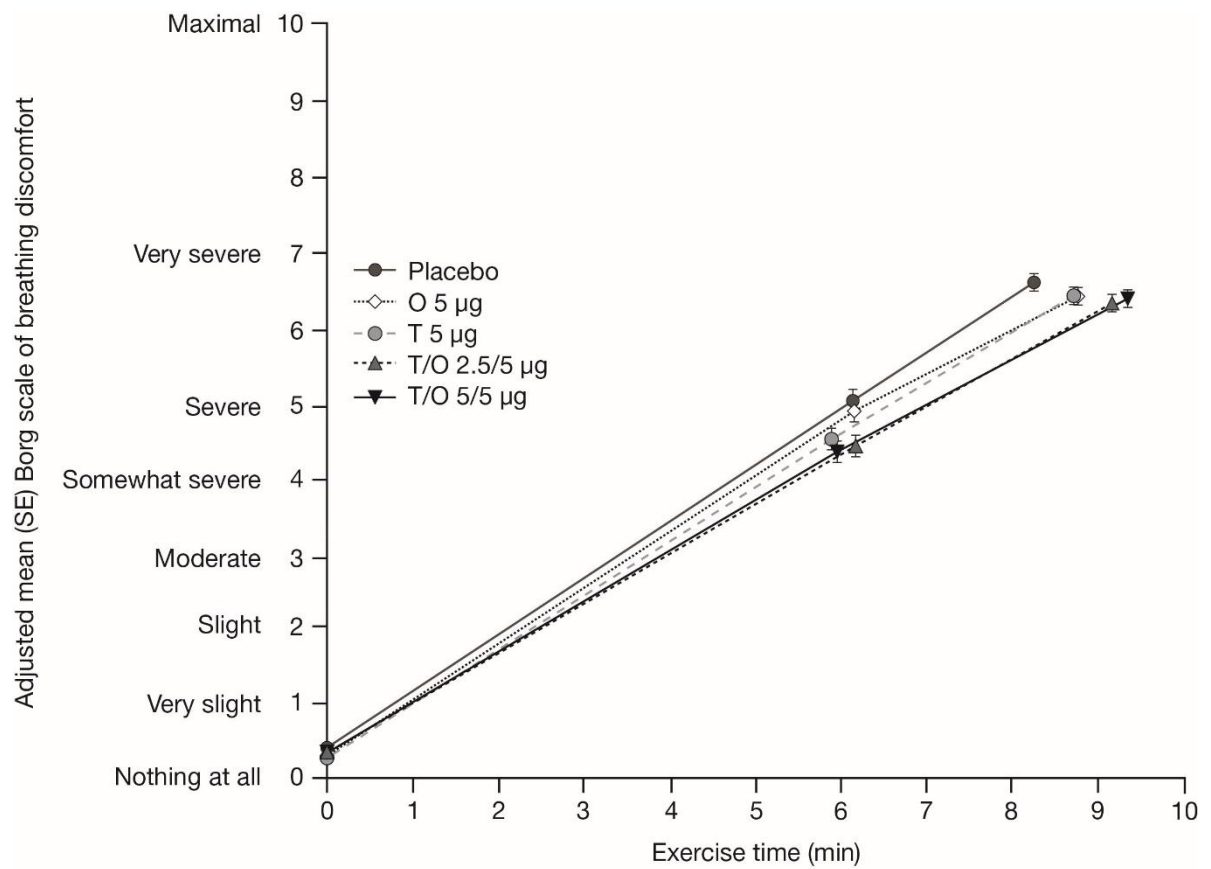

|              | Pre-exercise           | Isotime                                | End-exercise           |
|--------------|------------------------|----------------------------------------|------------------------|
| T/O 5/5 µg   | NS for all comparisons | p<0.0001 vs placebo; p<0.001 vs O 5 µg | NS for all comparisons |
| T/O 2.5/5 µg |                        | p=0.0001 vs placebo; p<0.01 vs O 5 µg  | p<0.05 vs placebo      |
